# Supplementary material for: A novel pyrenyl-furan hydrazone on paper-based device for the selective detection of trinitrotoluene
Source: Royal Society of Chemistry journal article supplement (doi:10.1039/d3nj00404j), 2023-01-01
Supplement: d3nj00404j1.pdf [file d3nj00404j1.pdf]

## Supporting Information

### **A novel pyrenyl-furan hydrazone on paper-based device for the selective detection of trinitrotoluene**

Anusorn Liabsungnoen,<sup>a</sup> Pipattra Mayurachayakul,<sup>a</sup> Kittiwat Srikittiwanna,<sup>a</sup> Wijitar Dungchai,<sup>a</sup> Mongkol Sukwattanasinitt,<sup>b</sup> Choladda Srisuwannaket,<sup>a</sup> Withawat Mingvanish,<sup>a</sup> and Nakorn Niamnont\*<sup>a</sup>

<sup>a</sup> Organic Synthesis, Electrochemistry & Natural Product Research Unit, Department of Chemistry, Faculty of Science, King Mongkut's University of Technology Thonburi, Bangkok, 10140, Thailand.

<sup>c</sup> Organic Synthesis Research Unit, Department of Chemistry, Faculty of Science and Nanotec-CU Center of Excellence on Food and Agriculture, Chulalongkorn University, Bangkok, 10330, Thailand.

\*Corresponding author: Nakorn Niamnont, E-mail address: nakorn.nia@kmutt.ac.th

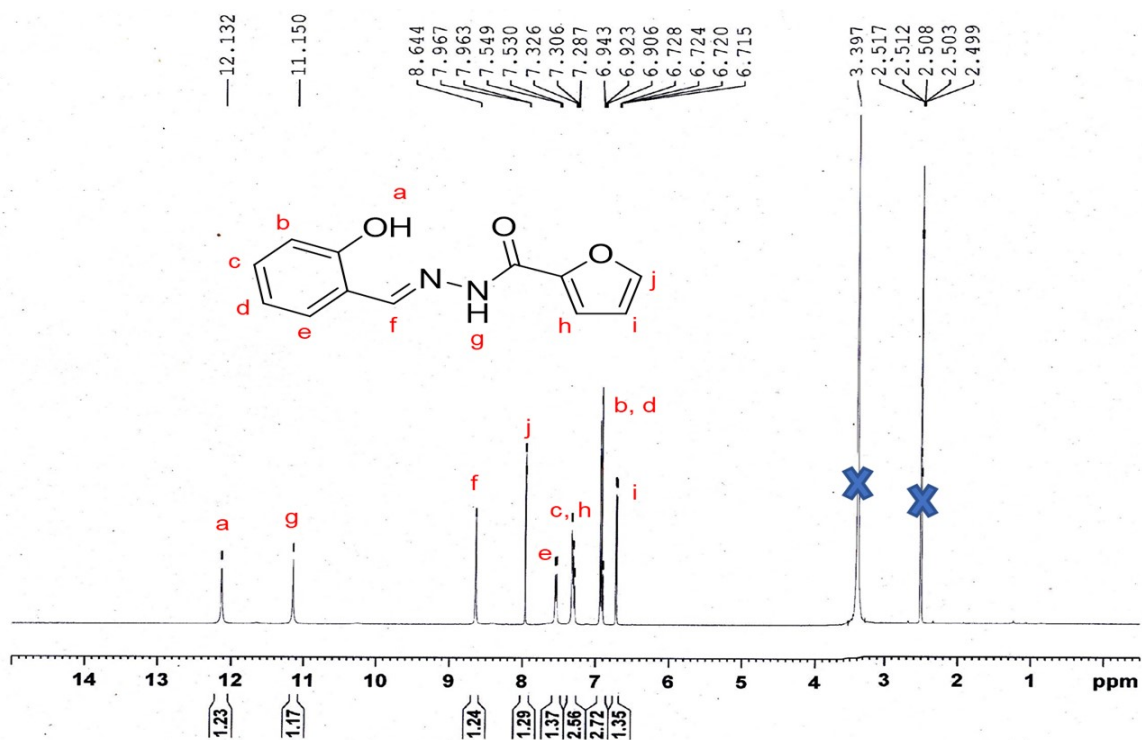

Fig. S1: The <sup>1</sup>H NMR (400 MHz, DMSO-*d*<sub>6</sub>) spectrum of T1.

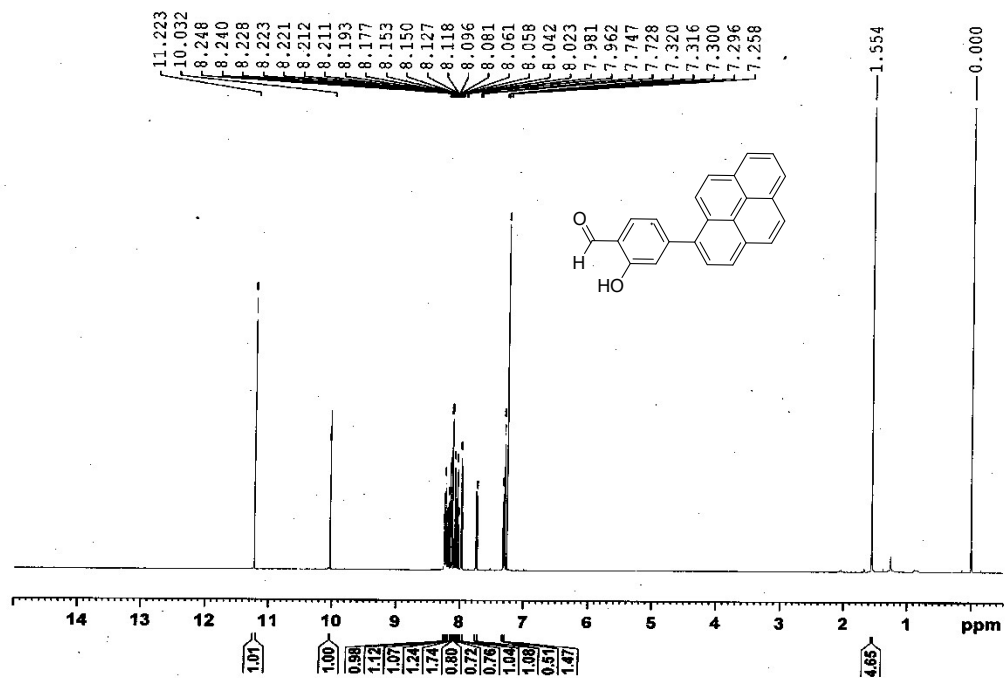

Fig. S2: The <sup>1</sup>H NMR (400 MHz, CDCl<sub>3</sub>) spectrum of compound 1.

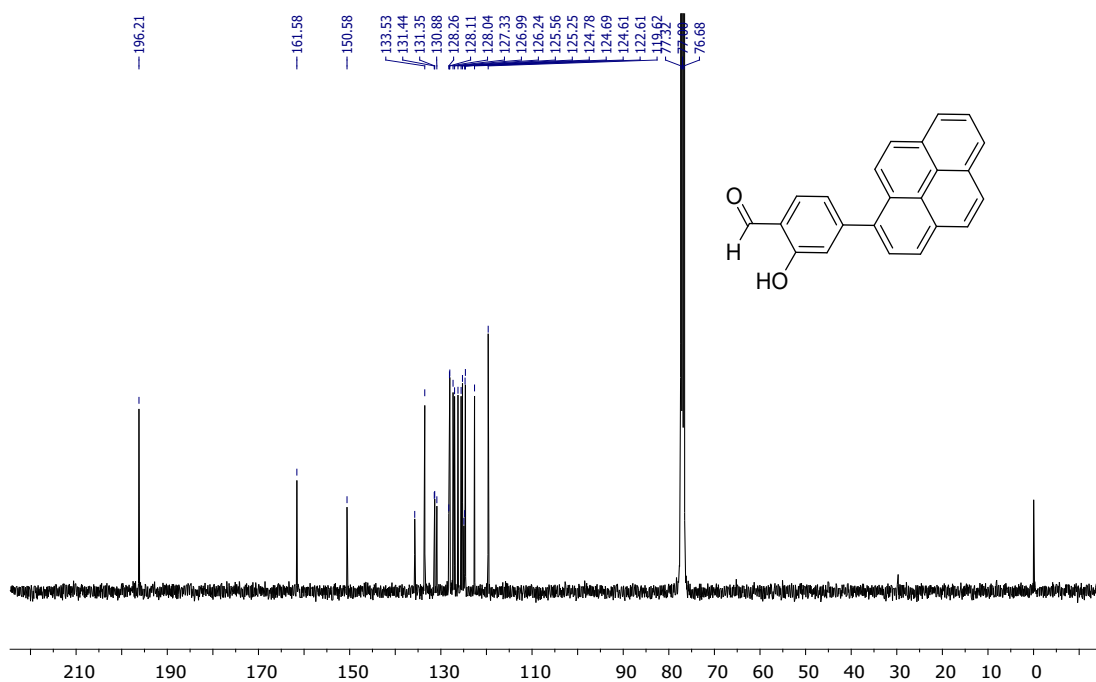

**Fig. S3:** The  $^{13}\text{C}$  NMR (100 MHz,  $\text{CDCl}_3$ ) spectrum of compound 1.

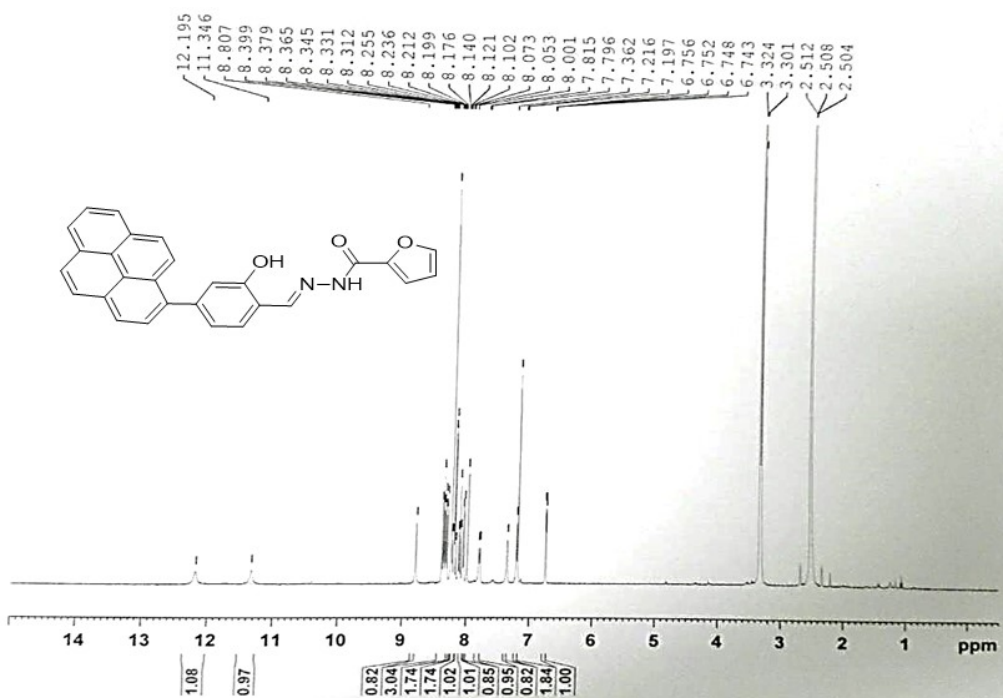

**Fig. S4:** The  $^1\text{H}$  NMR (400 MHz,  $\text{DMSO}-d_6$ ) spectrum of T2.

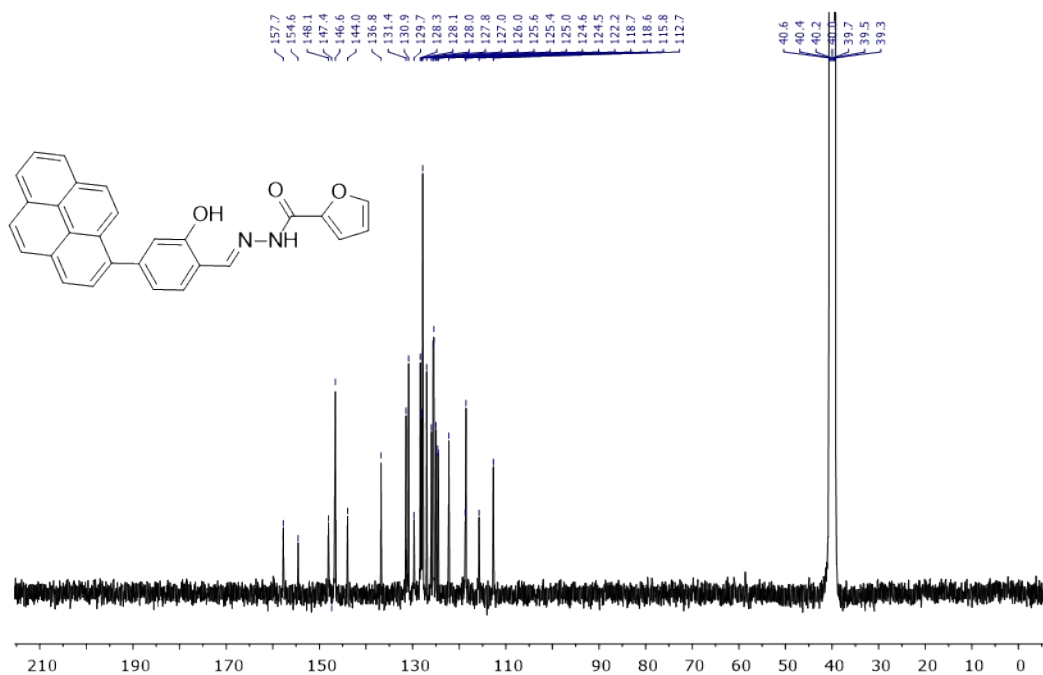

**Fig. S5:** The <sup>13</sup>C NMR (100 MHz, DMSO-*d*<sub>6</sub>) spectrum of **T2**.

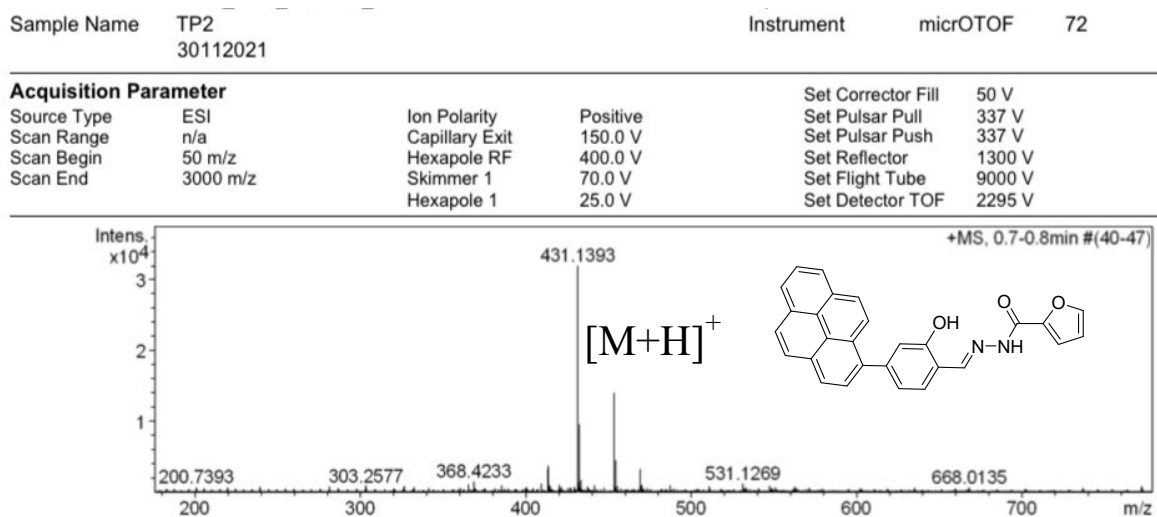

**Fig. S6:** HRMS spectrum of **T2**.
